# Supplementary material
Source: HighWire-hosted journal article supplement (https://bmjopen.bmj.com/content/13/9/e074584)
Supplement: inline-supplementary-material-1 [file inline-supplementary-material-1.pdf]

## Supplementary material

### Reveal Linq® Medtronic settings

#### **Step 1:**

- Patient and physician details are entered, paying attention to complete all mandatory fields.

#### **Step 2:**

- Cryptogenic stroke is selected as the reason for monitoring.

#### **Step 3 : Settings**

The following settings are entered:

- Symptom => Four 7.5 min Episodes.
- Tachy => Detection: On; Interval: 330ms (182 bpm); duration: 16 beats.
- Brady => Detection: On; Interval: 2000ms (30 bpm); duration: 8 beats.
- Pause => Detection: On; Duration: 4,5 sec.
- AT/AF => AF Only.
  - **For AT/AF:**
    - AT/AT Detection: On
    - Type: AF Only
    - AF Detection: Balanced Sensitivity
    - Ectopy Rejection: Aggressive
    - AT/AF Recording Threshold: All Episodes
